# Supplementary material for: SEAS: A System for SEED-Based Pathway Enrichment Analysis
Source: PLoS One. 2011 Jul 22;6(7):e22556. doi: 10.1371/journal.pone.0022556 (PMC3142180; doi:10.1371/journal.pone.0022556)
Supplement: Table S2 — Significant pathways in two E. coli mutants. (XLS) [file pone.0022556.s002.xls]

## Sheet: SEED
SEED subsystem	Genes in sample	Gene number in this subsystem	Sample size	Genes in the whole genome	Gene number in the whole genome	Genome size	P_value	Bonferroni	Holm	Hochberg	SidakSS	SidakSD	BH	BY	ABH	TSBH_0.05
Flagellum	b1072,b1073,b1074,b1075,b1076,b1077,b1078,b1082,b1083,b1922,b1923,b1924,b1944,b1945	14	31	b1070,b1071,b1072,b1073,b1074,b1075,b1076,b1077,b1078,b1079,b1080,b1081,b1082,b1083,b1878,b1879,b1880,b1889,b1890,b1891,b1892,b1921,b1922,b1923,b1924,b1925,b1926,b1937,b1938,b1939,b1940,b1941,b1942,b1943,b1944,b1945,b1946,b1947,b1948,b1949,b1950,b3067,b3202	43	2154	0	0	0	0	0	0	0	0	NA	0
Type 1 pili (mannose-sensitive fimbriae)	b4314,b4315,b4316,b4318,b4319,b4320	6	31	b0940,b1502,b1503,b1504,b4312,b4313,b4314,b4315,b4316,b4317,b4318,b4319,b4320	13	2154	8.54964e-09	1.28245e-07	1.19695e-07	1.19695e-07	1.28245e-07	1.19695e-07	6.41223e-08	2.12773e-07	NA	4.7023e-08
Flagellar motility	b1075,b1922,b1945	3	31	b1075,b1079,b1879,b1880,b1882,b1888,b1889,b1890,b1922,b1941,b1945,b1946,b1950,b3202	14	2154	0.000883183	0.0132477	0.0114814	0.0114814	0.0131662	0.0114207	0.00441591	0.014653	NA	0.00323834
Flagellum in Campylobacter	b1073,b1074	2	31	b0084,b1073,b1074,b1937	4	2154	0.0011817	0.0177256	0.0141805	0.0141805	0.0175797	0.0140887	0.00443139	0.0147044	NA	0.00324969
Bacterial Chemotaxis	b1886,b1945	2	31	b1421,b1487,b1881,b1882,b1883,b1884,b1885,b1886,b1887,b1888,b1939,b1945,b1946,b2150,b3072,b3544,b4034,b4355	18	2154	0.02658	0.398701	0.29238	0.252652	0.332419	0.256463	0.0630936	0.209359	NA	0.0462687
Lysozyme inhibitors	b0220	1	31	b0220,b1639	2	2154	0.0285831	0.428747	0.29238	0.252652	0.352731	0.256463	0.0630936	0.209359	NA	0.0462687
Colanic acid biosynthesis	b2053,b2055	2	31	b0981,b0982,b2044,b2045,b2046,b2047,b2050,b2051,b2052,b2053,b2054,b2055,b2056,b2057,b2058,b2059,b2060,b2061,b2062	19	2154	0.0294437	0.441655	0.29238	0.252652	0.361279	0.256463	0.0630936	0.209359	NA	0.0462687
RNA 3'-terminal phosphate cyclase	b3422	1	31	b3421,b3422,b4475	3	2154	0.0425766	0.638649	0.340613	0.252652	0.479332	0.293955	0.0798311	0.264898	NA	0.0585428
YjbEFGH Locus Involved in Exopolysaccharide Production	b4026	1	31	b4026,b4027,b4028,b4029	4	2154	0.0563749	0.845623	0.394624	0.252652	0.581214	0.333813	0.0939581	0.311775	NA	0.0689026
Auxin biosynthesis	b1262	1	31	b1260,b1261,b1262,b1263,b1386	5	2154	0.0699806	1	0.419884	0.252652	0.663194	0.352929	0.104246	0.345911	NA	0.0764467
Capsular heptose biosynthesis	b2053	1	31	b0200,b0222,b2038,b2052,b2053,b3149	6	2154	0.0833965	1	0.419884	0.252652	0.729154	0.352995	0.104246	0.345911	NA	0.0764467
Rcs phosphorelay signal transduction pathway	b1951	1	31	b0055,b0196,b1951,b2216,b2217,b2218	6	2154	0.0833965	1	0.419884	0.252652	0.729154	0.352995	0.104246	0.345911	NA	0.0764467
Transcription initiation, bacterial sigma factors	b1922	1	31	b1922,b2570,b2571,b2572,b2573,b2741,b3067,b3202,b3461	9	2154	0.12253	1	0.419884	0.252652	0.859238	0.352995	0.141381	0.469133	NA	0.103679
Oxidative stress	b0812	1	31	b0683,b0812,b0950,b0951,b1334,b1646,b1656,b1732,b1833,b1834,b3908,b3942,b3961,b4046,b4063,b4178	16	2154	0.207656	1	0.419884	0.252652	0.969542	0.372191	0.222489	0.738268	NA	0.163158
Cobalt-zinc-cadmium resistance	b0812	1	31	b0212,b0570,b0571,b0572,b0573,b0574,b0575,b0750,b0751,b0752,b0812,b0813,b1473,b1519,b1533,b1959,b3184,b3292,b3915,b4484	20	2154	0.252652	1	0.419884	0.252652	0.987328	0.372191	0.252652	0.838356	NA	0.185278

## Sheet: KEGG
KEGG pathway	Genes in sample	Gene number in this subsystem	Sample size	Genes in the whole genome	Gene number in the whole genome	Genome size	P_value	Bonferroni	Holm	Hochberg	SidakSS	SidakSD	BH	BY	ABH	TSBH_0.05
Bacterial motility proteins	b0531,b1072,b1073,b1074,b1075,b1076,b1077,b1078,b1082,b1083,b1886,b1922,b1923,b1924,b1944,b1945,b4314,b4315,b4316,b4318,b4319,b4320	22	34	b0229,b0230,b0530,b0531,b0532,b0533,b0534,b0940,b1070,b1071,b1072,b1073,b1074,b1075,b1076,b1077,b1078,b1079,b1080,b1081,b1082,b1083,b1421,b1878,b1879,b1880,b1881,b1882,b1883,b1884,b1885,b1886,b1887,b1888,b1889,b1890,b1891,b1892,b1920,b1921,b1922,b1923,b1924,b1925,b1926,b1937,b1938,b1939,b1940,b1941,b1942,b1943,b1944,b1945,b1946,b1947,b1948,b1949,b1950,b2950,b2972,b3072,b3144,b4314,b4315,b4316,b43…	71	2982	0	0	0	0	0	0	0	0	0	0
Flagellar assembly	b1072,b1073,b1074,b1075,b1076,b1077,b1078,b1082,b1083,b1923,b1924,b1945	12	34	b0229,b0230,b1070,b1071,b1072,b1073,b1074,b1075,b1076,b1077,b1078,b1079,b1080,b1082,b1083,b1879,b1880,b1889,b1890,b1891,b1892,b1923,b1924,b1925,b1926,b1937,b1938,b1939,b1940,b1941,b1942,b1943,b1945,b1946,b1947,b1948,b1949,b1950	38	2982	1.22125e-15	2.44249e-14	2.32037e-14	2.32037e-14	2.44249e-14	2.32037e-14	1.22125e-14	4.39372e-14	7.93809e-15	1.03806e-14
Secretion system	b4314,b4316,b4318,b4319,b4320	5	34	b0097,b0098,b0106,b0107,b0108,b0229,b0407,b0408,b0409,b0442,b0627,b0913,b0940,b1037,b1038,b1039,b1041,b1042,b1043,b1879,b1880,b1938,b1940,b1941,b1946,b1947,b1948,b1949,b1950,b2000,b2610,b2823,b2825,b2826,b2893,b2950,b2952,b2968,b2969,b2970,b2972,b3035,b3144,b3175,b3300,b3322,b3323,b3324,b3325,b3326,b3327,b3328,b3329,b3330,b3331,b3332,b3333,b3334,b3335,b3391,b3392,b3393,b3394,b3395,b3463,b3464,b36…	78	2982	0.00165301	0.0330601	0.0297541	0.0297541	0.0325461	0.0293397	0.01102	0.0396472	0.00716302	0.00936703
Bacterial chemotaxis	b1886,b1945	2	34	b0230,b1421,b1881,b1882,b1883,b1884,b1885,b1886,b1887,b1888,b1889,b1890,b1939,b1945,b1946,b2150,b3072,b3544,b3751,b4034,b4355	21	2982	0.0231427	0.462853	0.393425	0.393425	0.37393	0.328371	0.115713	0.416306	0.0752137	0.0983563
Plant-pathogen interaction	b1923	1	34	b0473,b1923,b3339,b3926,b3980	5	2982	0.05576	1	0.89216	0.779566	0.68257	0.600683	0.22304	0.80244	0.144976	0.189584
Vibrio cholerae pathogenic cycle	b1922	1	34	b1922,b2687,b2741,b3202,b3357,b3806,b4466	7	2982	0.0772086	1	1	0.779566	0.79952	0.700392	0.224261	0.806832	0.14577	0.190622
Protein folding and associated processing	b1379,b1482	2	34	b0283,b0436,b0605,b0606,b0824,b0881,b0885,b0902,b1324,b1379,b1454,b1482,b1778,b1967,b2099,b2480,b2620,b2673,b2712,b2726,b2727,b2728,b2729,b2730,b2743,b2875,b2989,b2990,b2991,b3053,b3102,b3229,b3356,b3414,b3765,b3891,b3952,b4174,b4175,b4219,b4237	41	2982	0.0784913	1	1	0.779566	0.805021	0.700392	0.224261	0.806832	0.14577	0.190622
Metabolism of cofactors and vitamins	b2303	1	34	b0782,b0827,b1336,b1581,b2214,b2303,b2928,b3802,b3856,b3857,b3929	11	2982	0.118696	1	1	0.779566	0.920106	0.806521	0.263769	0.948973	0.17145	0.224204
RNA polymerase	b1922	1	34	b1922,b2573,b2741,b3067,b3202,b3295,b3461,b3649,b3987,b3988,b4293	11	2982	0.118696	1	1	0.779566	0.920106	0.806521	0.263769	0.948973	0.17145	0.224204
Two-component system	b1886,b1922,b1923,b1951	4	34	b0161,b0167,b0196,b0383,b0399,b0399,b0400,b0400,b0535,b0535,b0564,b0570,b0570,b0571,b0571,b0572,b0573,b0574,b0575,b0612,b0613,b0614,b0615,b0616,b0617,b0618,b0619,b0619,b0620,b0620,b0694,b0694,b0695,b0695,b0696,b0697,b0698,b0929,b0993,b0993,b0995,b0995,b0996,b0997,b0998,b1129,b1129,b1130,b1130,b1221,b1221,b1222,b1222,b1224,b1225,b1226,b1227,b1235,b1421,b1474,b1475,b1476,b1479,b1608,b1608,b1609,b16…	192	2982	0.172061	1	1	0.779566	0.977093	0.874692	0.344123	1	0.22368	0.292504
Phenylalanine, tyrosine and tryptophan biosynthesis	b1262	1	34	b0388,b0754,b0908,b0928,b1260,b1261,b1262,b1263,b1264,b1692,b1693,b1704,b2021,b2329,b2599,b2600,b2601,b3281,b3389,b3390,b4054	21	2982	0.214652	1	1	0.779566	0.992034	0.910747	0.390276	1	0.253679	0.331735
Glycosyltransferases	b2055	1	34	b0149,b0182,b1896,b2055,b2057,b2257,b2519,b3208,b3396,b3429,b3533,b3620,b3621,b3623,b3624,b3626,b3627,b3628,b3629,b3631,b3632,b3633,b3784,b3793,b3794,b4481	26	2982	0.258746	1	1	0.779566	0.997492	0.932438	0.431244	1	0.280309	0.366557
Fructose and mannose metabolism	b2053	1	34	b0394,b1613,b1723,b1727,b1817,b1818,b1819,b1955,b2048,b2049,b2052,b2053,b2097,b2167,b2168,b2169,b2245,b2247,b2293,b2702,b2703,b2704,b2705,b2800,b2802,b2803,b2925,b2933,b2934,b3565,b3599,b3600,b3902,b3903,b3904,b3916,b3919,b3925,b4232	39	2982	0.362444	1	1	0.779566	0.999877	0.972701	0.550043	1	0.357528	0.467536
Amino sugar and nucleotide sugar metabolism	b2053	1	34	b0271,b0394,b0677,b0678,b0679,b0688,b0757,b0758,b0759,b1101,b1107,b1119,b1120,b1236,b1613,b1817,b1818,b1819,b2028,b2042,b2048,b2049,b2052,b2053,b2253,b2254,b2255,b2388,b2417,b2428,b2429,b3176,b3189,b3222,b3223,b3225,b3338,b3430,b3729,b3730,b3786,b3787,b3972,b4025	44	2982	0.398455	1	1	0.779566	0.999962	0.972701	0.550043	1	0.357528	0.467536
Chaperones and folding catalysts	b4316	1	34	b0014,b0015,b0028,b0053,b0055,b0161,b0438,b0441,b0473,b0492,b0525,b0604,b0650,b0849,b0882,b1000,b1064,b1185,b1654,b2069,b2195,b2526,b2527,b2582,b2592,b2614,b2893,b3178,b3347,b3349,b3363,b3400,b3401,b3609,b3610,b3686,b3687,b3738,b3775,b3781,b3860,b3931,b4136,b4142,b4143,b4207,b4316	47	2982	0.419105	1	1	0.779566	0.999981	0.972701	0.550043	1	0.357528	0.467536
Membrane and intracellular structural molecules	b1283	1	34	b0082,b0110,b0177,b0178,b0434,b0633,b0657,b0741,b0795,b0814,b0867,b0891,b1021,b1022,b1024,b1049,b1209,b1252,b1256,b1283,b1601,b1641,b1661,b1677,b1722,b1739,b1782,b1806,b2036,b2047,b2050,b2064,b2102,b2194,b2197,b2233,b2346,b2477,b2708,b2742,b2865,b3136,b3163,b3197,b3487,b3506,b3524,b3584,b3785,b4149,b4206,b4220,b4233,b4400	54	2982	0.464649	1	1	0.779566	0.999996	0.972701	0.550043	1	0.357528	0.467536
Chromosome	b0812	1	34	b0083,b0084,b0089,b0093,b0094,b0095,b0440,b0463,b0634,b0687,b0812,b0889,b0890,b0912,b0922,b0923,b0924,b0958,b1000,b1174,b1175,b1176,b1237,b1712,b1961,b2113,b2412,b2435,b2669,b2748,b2817,b2894,b2910,b2916,b3019,b3030,b3149,b3249,b3250,b3251,b3261,b3265,b3361,b3462,b3463,b3641,b3702,b3740,b3741,b3811,b3933,b4000,b4169,b4172,b4396	55	2982	0.470866	1	1	0.779566	0.999997	0.972701	0.550043	1	0.357528	0.467536
Others	b0234	1	34	b0036,b0037,b0038,b0039,b0207,b0219,b0234,b0342,b0459,b0460,b0493,b0555,b0581,b0597,b0686,b0804,b0822,b0901,b1010,b1304,b1305,b1307,b1308,b1412,b1525,b1539,b1554,b1808,b1838,b1856,b1932,b2044,b2051,b2054,b2058,b2137,b2299,b2340,b2495,b2552,b2718,b2721,b2734,b2960,b3003,b3012,b3156,b3287,b3407,b3441,b3494,b3503,b3550,b3881,b4012,b4084,b4243,b4256,b4539	59	2982	0.495039	1	1	0.779566	0.999999	0.972701	0.550043	1	0.357528	0.467536
General function prediction only	b2209,b4376	2	34	b0010,b0035,b0164,b0223,b0239,b0253,b0288,b0318,b0325,b0444,b0446,b0503,b0527,b0545,b0568,b0569,b0644,b0647,b0659,b0713,b0715,b0736,b0766,b0773,b0777,b0786,b0787,b0788,b0790,b0813,b0844,b0847,b0947,b0951,b0965,b0966,b0967,b0970,b1004,b1007,b1009,b1034,b1051,b1055,b1060,b1061,b1068,b1088,b1097,b1103,b1108,b1112,b1132,b1203,b1217,b1234,b1259,b1266,b1321,b1327,b1391,b1400,b1449,b1464,b1497,b1507,b16…	179	2982	0.615032	1	1	0.779566	1	0.972701	0.647402	1	0.420811	0.550291
Transcription factors	b1951	1	34	b0020,b0034,b0064,b0069,b0076,b0080,b0113,b0145,b0162,b0240,b0313,b0330,b0338,b0346,b0413,b0447,b0464,b0487,b0504,b0506,b0564,b0566,b0610,b0623,b0676,b0683,b0730,b0761,b0817,b0840,b0880,b0889,b0989,b0990,b1013,b1040,b1187,b1201,b1275,b1299,b1303,b1306,b1323,b1334,b1339,b1384,b1399,b1450,b1512,b1530,b1531,b1552,b1557,b1558,b1642,b1658,b1735,b1823,b1916,b1951,b1987,b2151,b2213,b2364,b2437,b2479,b24…	129	2982	0.779566	1	1	0.779566	1	0.972701	0.779566	1	0.506718	0.662631
